# Supplementary material for: Preparation, identification, activity prediction, and protective effects on IR-HepG2 cells of five novel DPP-IV inhibitory peptides from protein hydrolysate of skipjack tuna dark muscles
Source: Royal Society of Chemistry journal article supplement (doi:10.1039/d3fo02948d), 2023-01-01
Supplement: d3fo02948d1.pdf [file d3fo02948d1.pdf]

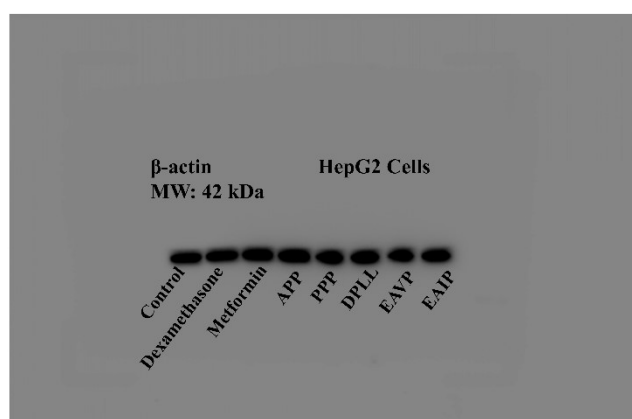

HepG2 Cells- $\beta$ -actin

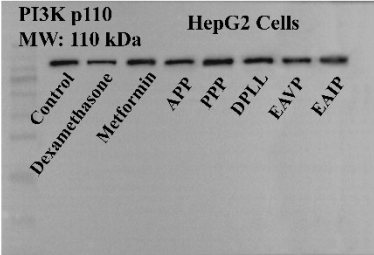

HepG2 Cells-PI3K p110

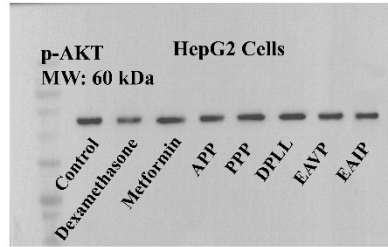

HepG2 Cells-p-AKT

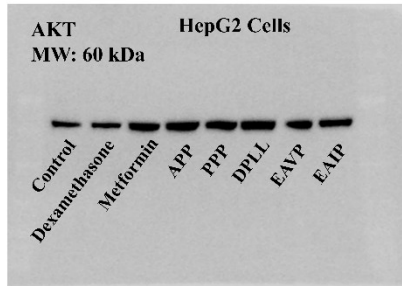

HepG2 Cells- AKT

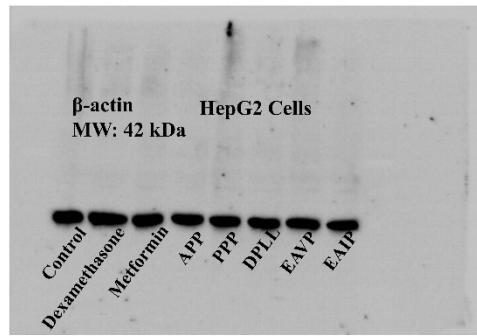

HepG2 Cells- $\beta$ -actin

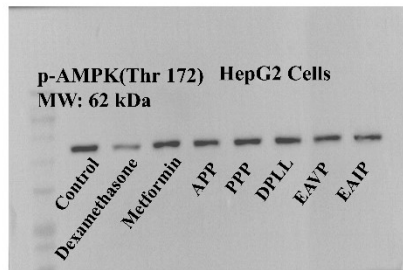

HepG2 Cells-p-AMPK

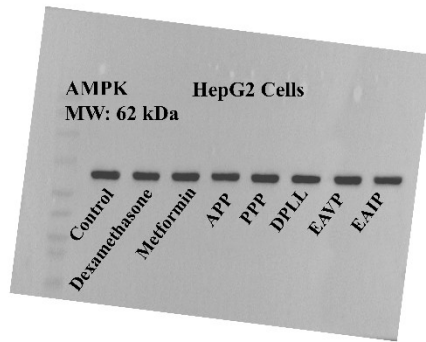

HepG2 Cells-AMPK
